# Supplementary material for: PVA–nano cellulose active packaging films with clay nano particles and fennel seed essential oil for enhanced thermal, barrier, antimicrobial, antioxidant and biodegradation properties to improve the shelf life of tofu
Source: Royal Society of Chemistry journal article supplement (doi:10.1039/d4fb00238e), 2024-12-24
Supplement: d4fb00238e1.pdf [file d4fb00238e1.pdf]

### Supplementary Data

## **PVA- Nano Cellulose Active Packaging Film with Clay Nano Particles and Fennel Seed Essential oil for Enhanced Thermal, Barrier, Antimicrobial, Antioxidant and Biodegradation property to improve shelf life of Tofu**

Ramesh Shruthy<sup>1‡</sup> and Radhakrishnan Preetha<sup>\*\*</sup>

#### **Table captions:**

**Table S1:** Cost analysis of 100gm of BBNCP-FSEO-MCNP-PVA nanocomposite film.

**Table S1:** Cost analysis of 100gm of BBNCP-FSEO-MCNP-PVA nanocomposite film.

| Particulars                                | Unit | BBNCP-FSEO-MCNP-PVA nanocomposite film |
|--------------------------------------------|------|----------------------------------------|
| Cost of BBNCP preparation                  | USD  | 0.016                                  |
| Cost PVA                                   | USD  | 0.0664                                 |
| Operational charges for nanocomposite film | USD  | 0.025                                  |
| Total Cost                                 | USD  | 0.1074                                 |

\*BBNCP-Box Badam Nano cellulose Particles, FSEO- Fennel Seed Essential Oil, MNCP- Montmorillonite nano clay particles, PVA- Polyvinyl Alcool, USD- United State Dollar

**Supplementary data Table (2):** Solubility % of control neat PVA, BBNCP-FSEO-MCNP-PVA nanocomposite films.

\*PVA-Polyvinyl Alcohol, BBNCP-Boxbadam nano cellulose particles

\*Data are expressed as means  $\pm$  the standard deviation (n = 3). In each row, each value followed by a different letter is significantly different (P  $\leq$  0.05) as determined by Tukey's posthoc test (SPSS v.22).

| Solubility % |                         |                                      |
|--------------|-------------------------|--------------------------------------|
| Time(min)    | Control Neat PVA        | BBNCP based nanocomposite            |
| 5            | 5±0.03 <sup>a</sup>     | 5±0.01 <sup>a</sup>                  |
| 10           | 10.01±0.02 <sup>b</sup> | 5±0.02 <sup>a</sup>                  |
| 15           | 16.33±0.05 <sup>b</sup> | 6.30±0.03 <sup>a</sup>               |
| 20           | 25.23±0.01 <sup>b</sup> | 10.25±0.05 <sup>a</sup>              |
| 25           | 29.19±0.05 <sup>b</sup> | 10±0.02 <sup>a</sup>                 |
| 30           | 35.14±0.02 <sup>b</sup> | 12.32±0.03 <sup>a</sup>              |
| 35           | 41.32±0.03 <sup>b</sup> | 13.15±0.06 <sup>b</sup> <sup>a</sup> |
| 40           | 55.32±0.05 <sup>b</sup> | 15±0.01 <sup>a</sup>                 |
| 45           | 60±0.02 <sup>b</sup>    | 16±0.04 <sup>a</sup>                 |
| 50           | 72.22±0.06 <sup>b</sup> | 20±0.03 <sup>a</sup>                 |
| 55           | 93.22±0.02 <sup>b</sup> | 21±0.01 <sup>a</sup>                 |
| 60           | 100 <sup>b</sup>        | 25±0.02 <sup>a</sup>                 |
